# Supplementary material
Source: Springer Nature journal article supplement (https://www.springermedizin.de/resource/supplementary/12879_2012_2567_MOESM1_ESM.pdf/9444864)

**A**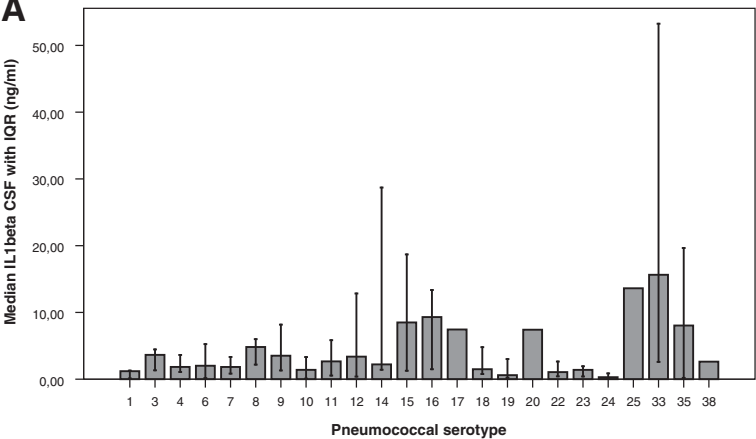**B**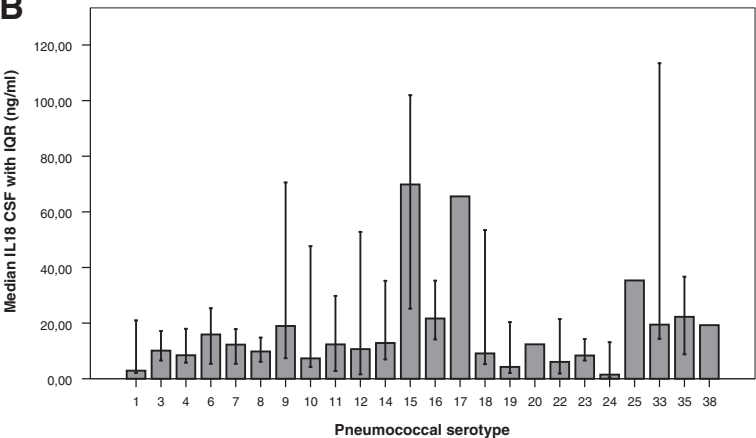

Supplement: MOESM1 [file 9444864]
